# Supplementary material for: Immunological imprinting of the antibody response in COVID-19 patients
Source: PubMed Central journal article supplement (PMC8213790; doi:10.1038/s41467-021-23977-1), 2021-06-18
Supplement: 41467_2021_23977_MOESM1_ESM.pdf [file 41467_2021_23977_MOESM1_ESM.pdf]

**Supplementary Information for**  
**Immunological Imprinting of the Antibody Response in COVID-19 Patients**

by Teresa Aydillo et al.

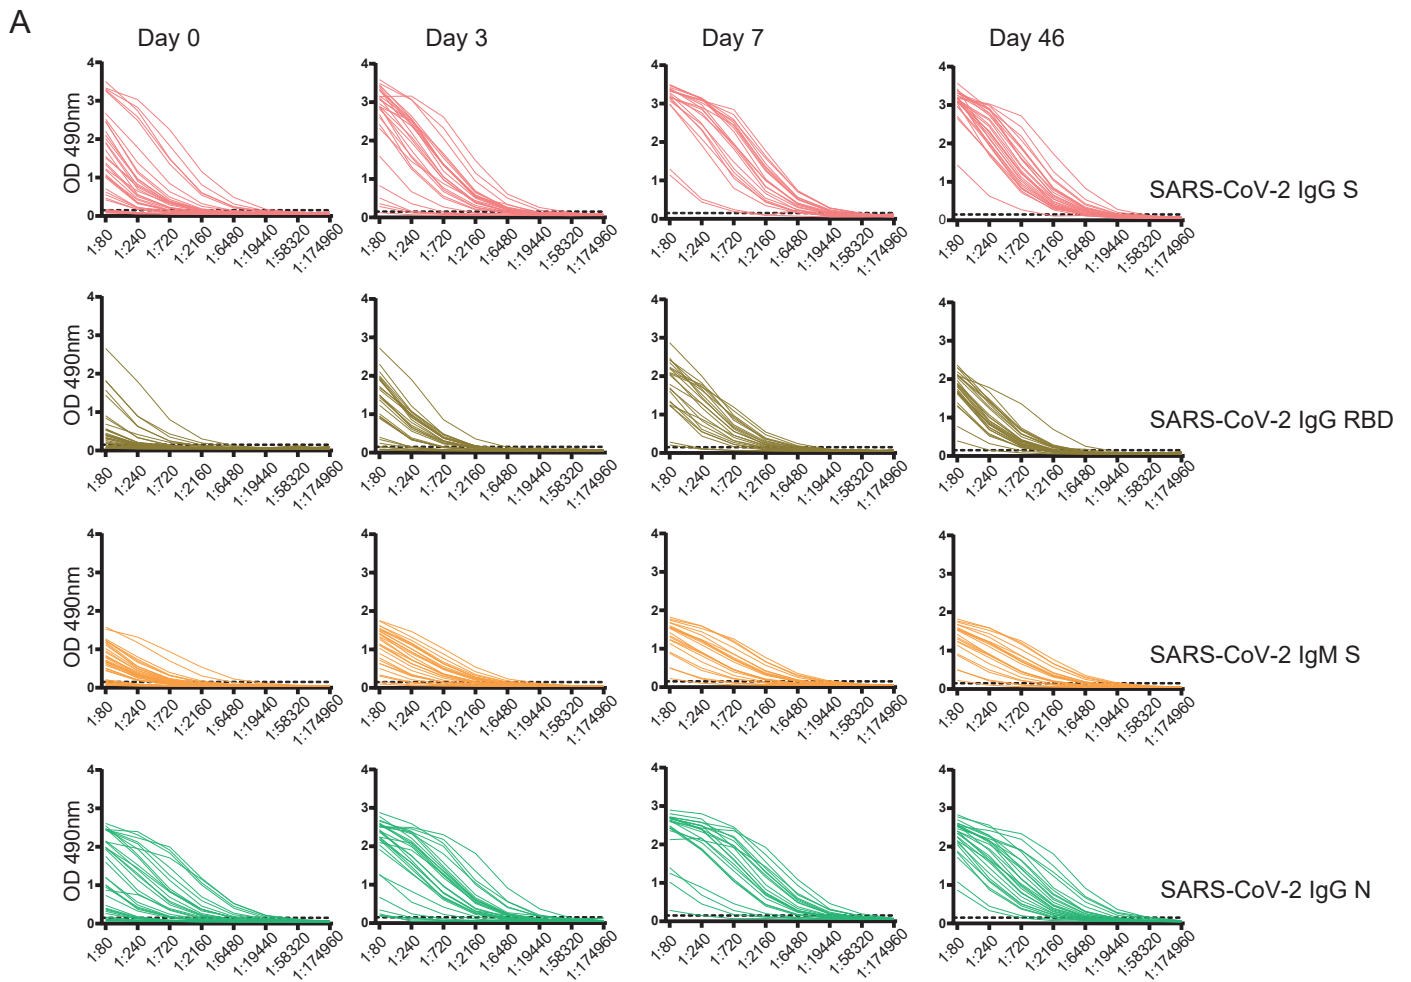

Supplemental Figure 1. Binding profile of the serial dilution curve for each individual serum sample collected at day 0, 3, 7 and 46 in the BACO Cohort. ELISAs assays were performed for the indicated SARS-CoV-2 antigens: IgG spike, IgG RBD, IgM spike and IgG NP. Area-under-the-curve (AUC) values were computed by plotting normalized optical density (OD) values against the reciprocal serum sample dilutions and used to quantify antibody titers for each individual serum.

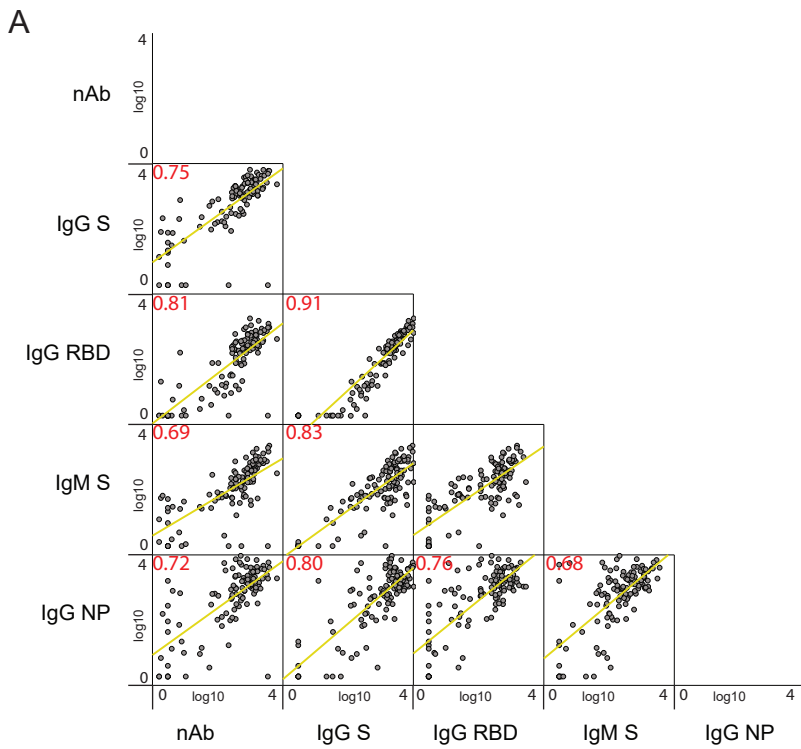

Supplemental Figure 2. Scatterplot matrix of the relationship between measured SARS-CoV-2 antibody responses in the COVID-19 patients. Relationship of each antibody levels is tested for the correlations shown: ELISA AUC titers against SARS-CoV-2 (IgG spike, IgG RBD, IgM spike and IgG NP) and neutralizing titer (IC<sub>50</sub>%). Pearson coefficient of statistically significant correlations are indicated in red. Fitted linear regression lines for each interaction are shown in yellow. Matrix axis are log<sub>10</sub> values scaled from 0 to 4.

A

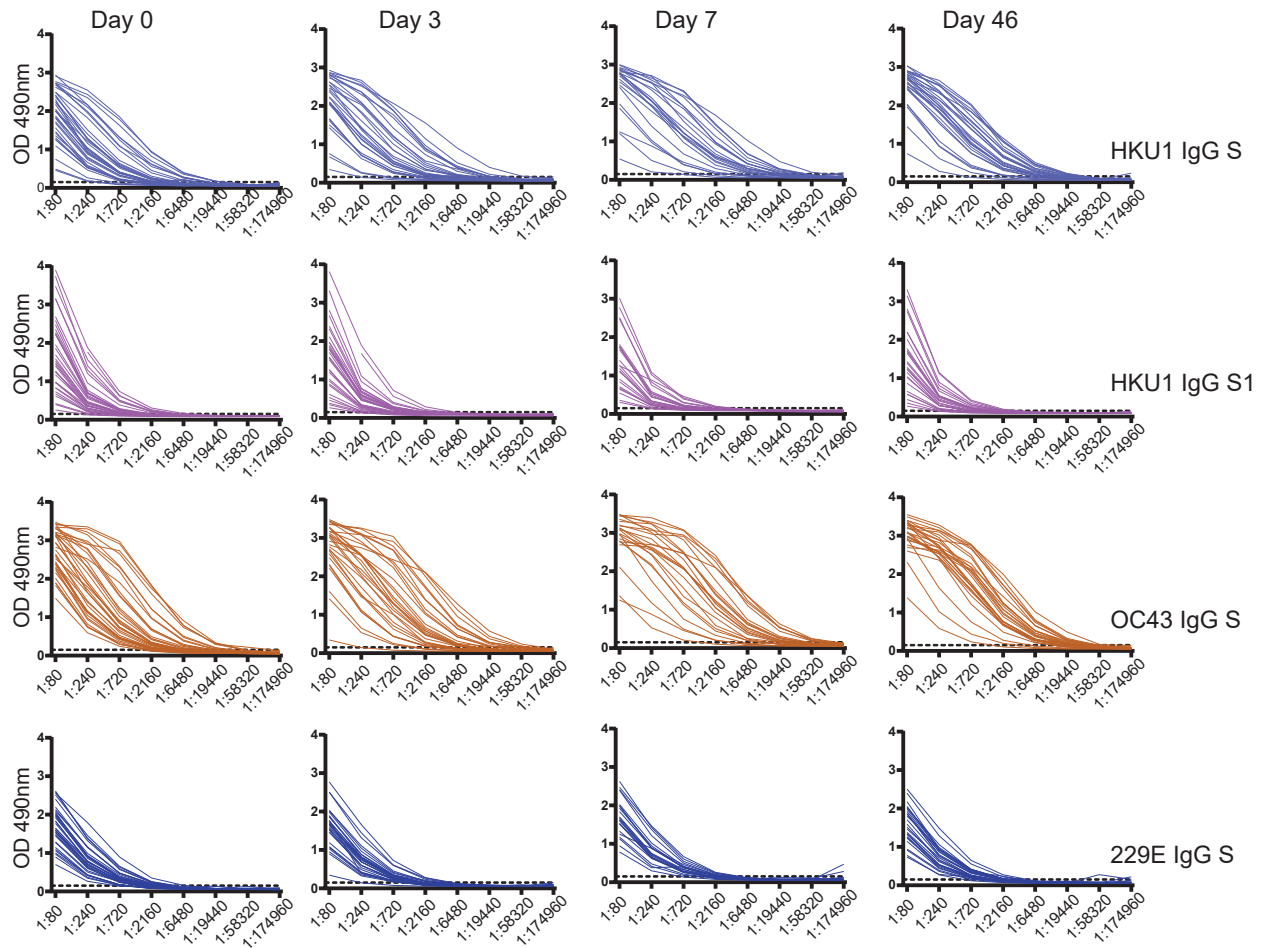

Supplemental Figure 3. Binding profile of the serial dilution curve for each individual serum sample collected at day 0, 3, 7 and 46 in the BACO Cohort. ELISAs were performed for the indicated SARS-CoV-2 antigens: IgG HKU1 spike, IgG HKU1 S1, IgG OC43 spike and IgG 229E. Area-under-the-curve (AUC) values were computed by plotting normalized optical density (OD) values against the reciprocal serum sample dilutions and used to quantify antibody titers for each individual serum.

Supplementary Table 1. Antibody response to the pandemic SARS-CoV-2 and seasonal beta- and alpha-coronaviruses.

|                    | GMT (CI 95%)     | GMT (CI 95%)     | GMT (CI 95%)      | GMT (CI 95%)     |
|--------------------|------------------|------------------|-------------------|------------------|
|                    | Day 0            | Day 3            | Day 7             | Day 46           |
| SARS-CoV-2 IgG S   | 134 (53-339)     | 1161 (490-2749)  | 5025 (2986-8456)  | 3552 (2665-4736) |
| SARS-CoV-2 IgG RBD | 12 (6-27)        | 112 (43-289)     | 587 (266-1293)    | 566 (388-825)    |
| SARS-CoV-2 IgM S   | 47 (22-103)      | 250 (114-550)    | 683 (313-1490)    | 194 (97-389)     |
| SARS-CoV-2 IgG N   | 150 (53-424)     | 1187 (467-3017)  | 3892 (1781-8504)  | 2305 (1437-3699) |
| IC50%              | 58 (19 -174)     | 201 (52-763)     | 1373 (735-2565)   | 601 (330-41095)  |
| HKU1 IgG S         | 747 (475-1175)   | 1513 (898-2552)  | 3363 (1756-6442)  | 2700 (1763-4134) |
| HKU1 IgG S1        | 230 (151-351)    | 190 (122-294)    | 146 (87-244)      | 186 (113-306)    |
| OC43 IgG S         | 2168 (1460-3220) | 3853 (2370-6262) | 8027 (4615-13961) | 6447 (4471-9295) |
| HI OC43            | 75 (50-113)      | 70 (44-113)      | 43 (22-85)        | 99 (62-159)      |
| 229E IgG S         | 455 (356-581)    | 411 (322-525)    | 472 (357-624)     | 373 (286-486)    |

GMT: geometric mean titer; CI 95%: confidence interval 95%; IgG: immunoglobulin G; IgM: immunoglobulin M; S: spike; RBD: receptor binding domain; IC50%: inhibitory concentration 50%; S1: spike subdomain 1.

Supplementary Table 2. Fold antibodies rise to the pandemic SARS-CoV-2 and seasonal beta- and alpha-coronaviruses.

|                    | GMFR (CI 95%)   | GMFR (CI 95%)     | GMFR (CI 95%)     |
|--------------------|-----------------|-------------------|-------------------|
|                    | Day 3           | Day 7             | Day 46            |
| SARS-CoV-2 IgG S   | 11.6 (6.6-20.2) | 44.9 (12.9-155.8) | 26.1 (9.6-70.7)   |
| SARS-CoV-2 IgG RBD | 12.7 (6.3-25.6) | 59.4 (22.1-160.0) | 54.8 (24.4-123.3) |
| SARS-CoV-2 IgM S   | 7.5 (4.5-12.4)  | 22.0 (7.2-66.4)   | 3.8 (1.6-9.0)     |
| SARS-CoV-2 IgG N   | 12.6 (6.1-26)   | 32.5 (9.8-107.3)  | 13.1 (4.7-36.1)   |
| IC50%              | 6.4 (2.1-19)    | 23.5 (7.1-78)     | 11.1 (3.8-31.6)   |
| HKU1 IgG S         | 2.6 (1.5-2.97)  | 3.82 (2.4-6.1)    | 3.1 (2.1-4.5)     |
| HKU1 IgG S1        | 0.9 (0.8-1.1)   | 0.8 (0.7-1)       | 0.8 (0.7-0.9)     |
| OC43 IgG S         | 2.2 (1.6-3.1)   | 4 (2.4-6.5)       | 3 (2.1-4.2)       |
| HI OC43            | 1 (0.6-1.6)     | 0.7 (0.3-1.4)     | 1.4 (1-2)         |
| 229E IgG S         | 1 (0.8-1.2)     | 0.9 (0.8-1.1)     | 0.9 (0.7-1)       |

GMFR: geometric mean fold rise; CI 95%: confidence interval 95%; IgG: immunoglobulin G; IgM: immunoglobulin M; S: spike; RBD: receptor binding domain; IC50%: inhibitory concentration 50%; S1: spike subdomain 1.

Supplementary Table 3. List of primers used to detect SARS-CoV-2 RNA

| Name           | Description                 | Oligonucleotide Sequence (5'>3') |
|----------------|-----------------------------|----------------------------------|
| 2019-nCoV_N1-F | 2019-nCoV_N1 Forward Primer | GAC CCC AAA ATC AGC GAA AT       |
| 2019-nCoV_N1-R | 2019-nCoV_N1 Reverse Primer | TCT GGT TAC TGC CAG TTG AAT CTG  |
| 2019-nCoV_N2-F | 2019-nCoV_N2 Forward Primer | TTA CAA ACA TTG GCC GCA AA       |
| 2019-nCoV_N2-R | 2019-nCoV_N2 Reverse Primer | GCG CGA CAT TCC GAA GAA          |
| RP-F           | RNase P Forward Primer      | AGA TTT GGA CCT GCG AGC G        |
| RP-R           | RNase P Reverse Primer      | GAG CGG CTG TCT CCA CAA GT       |
